# Supplementary material for: Salivary proteomic profile of young healthy subjects
Source: PubMed Central journal article supplement (PMC10720708; doi:10.3389/fmolb.2023.1327233), 2023-11-30
Supplement: DataSheet2.pdf [file DataSheet2.pdf]

| N: Mol. weight [kDa] | T: Protein IDs                  | T: Majority protein IDs         | T: Protein names              | T: Gene names           |
|----------------------|---------------------------------|---------------------------------|-------------------------------|-------------------------|
| 116,72               | A0A024QZN4;V9HWK2;P18206;B4E3C  | A0A024QZN4;V9HWK2;P18206;B4E3C  | Vinculin                      | VCL;HEL114              |
| 58,112               | A0A024QZQ2;P07602;Q53FJ5;C9JIZ6 | A0A024QZQ2;P07602;Q53FJ5;C9JIZ6 | Prosaposin;Saposin-A;Sapo:    | PSAP                    |
| 13,989               | Q99879;U3KQK0;A0A024QZZ7;B4DR5  | Q99879;U3KQK0;A0A024QZZ7;B4DR5  | Histone H2B type 1-M;Histo    | HIST1H2BM;HIST1H2BN;HI  |
| 32,922               | P52907;A0A024R0E5;A8K0T9        | P52907;A0A024R0E5;A8K0T9        | F-actin-capping protein sub   | CAPZA1                  |
| 117,85               | A0A024R1A3;P22314;B4DDE4;B4DL6  | A0A024R1A3;P22314;B4DDE4;B4DL6  | Ubiquitin-like modifier-acti  | UBE1;UBA1               |
| 226,53               | P35579;A0A024R1N1;A0A0U4BW16;C  | P35579;A0A024R1N1;A0A0U4BW16    | Myosin-9                      | MYH9                    |
| 21,429               | P15153;A0A024R1P2;B1AH77;B1AH8  | P15153;A0A024R1P2;B1AH77;B1AH8  | Ras-related C3 botulinum tc   | RAC2                    |
| 41,92                | A0A024R1Z6;Q99536;B3KUF8;K7ESA3 | A0A024R1Z6;Q99536;B3KUF8        | Synaptic vesicle membrane     | VAT1                    |
| 42,1                 | A0A024R2B6;P36952;B4DWS9;C9JLV  | A0A024R2B6;P36952;B4DWS9        | Serpin B5                     | SERPINB5                |
| 21,768               | P61586;A0A024R324;A0A024R0I3;P0 | P61586;A0A024R324;A0A024R0I3;P0 | Transforming protein RhoA;    | RHOA;hCG_2043376;RHOC   |
| 30,777               | A0A024R3E3;P02647;F8W696;Q9Y35  | A0A024R3E3;P02647;F8W696        | Apolipoprotein A-I;Proapoli   | APOA1                   |
| 47,168               | P06733;A0A024R4F1;E2DRY6;K7EM9C | P06733;A0A024R4F1;E2DRY6        | Alpha-enolase;Enolase         | ENO1                    |
| 31,969               | Q0QF37;Q75MT9;Q6FHZ0;A0A024R4K  | Q0QF37;Q75MT9;Q6FHZ0;A0A024R4K  | Malate dehydrogenase;Malate   | MDH2                    |
| 16,142               | A0A024R528;P18510               | A0A024R528;P18510               | Interleukin-1 receptor antag  | IL1RN                   |
| 51,026               | A0A024R611;P31146;Q59G88;H3BRY  | A0A024R611;P31146;Q59G88;H3BR   | Coronin;Coronin-1A            | CORO1A                  |
| 13,897               | Q86TY5;Q6FGL0;A0A024R693;Q59FR8 | Q86TY5;Q6FGL0;A0A024R693;Q59FR8 | Galectin;Galectin-3           | LGALS3;hCG_22119        |
| 13,078               | G3V2V8;J3KMY5;Q53HV6;A0A024R6C  | G3V2V8;J3KMY5;Q53HV6;A0A024R6C  | Epididymal secretory protei   | NPC2                    |
| 55,52                | A0A024R718;P43490;A0A0C4DFS8;Q6 | A0A024R718;P43490               | Nicotinamide phosphoribo:     | PBEF1;NAMPT             |
| 19,25                | A0A024R8D7;P31025;Q5VSP4        | A0A024R8D7;P31025               | Lipocalin-1                   | LCN1                    |
| 57,116               | P07237;A0A024R8S5;H7BZ94;B4DUA  | P07237;A0A024R8S5;H7BZ94;B4DU   | Protein disulfide-isomerase   | P4HB                    |
| 36,748               | A0A024R9G4;Q9NUQ9;Q68D08;E5RI1  | A0A024R9G4;Q9NUQ9;Q68D08        | Protein FAM49B                | FAM49B;DKFZp686B04128   |
| 21,258               | A0A024RAE4;B4E1U9;P60953;A0A024 | A0A024RAE4;B4E1U9;P60953;A0A02  | Cell division control proteir | CDC42;hCG_39634         |
| 47,371               | P61158;A0A024RAI1;B4DXW1;Q59FV  | P61158;A0A024RAI1;B4DXW1;Q59F   | Actin-related protein 3       | ACTR3                   |
| 22,988               | A0A024RAS5;P52566;B2R4F3;F5H6C  | A0A024RAS5;P52566;B2R4F3;F5H6C  | Rho GDP-dissociation inhib    | ARHGDI3                 |
| 107,53               | P32926;A0A024RC30;Q7Z2Z5        | P32926;A0A024RC30               | Desmoglein-3                  | DSG3                    |
| 49,416               | A0A024RC87;A0A140VJT8;P13489;H0 | A0A024RC87;A0A140VJT8;P13489;H  | Ribonuclease inhibitor        | RNH1                    |
| 75,207               | A0A024RDE1;Q14515;Q8N4S1;B7ZB6  | A0A024RDE1;Q14515;Q8N4S1;B7ZB6  | SPARC-like protein 1          | SPARCL1                 |
| 70,289               | V9HWJ7;A0A024RDT4;P13796;Q53FI  | V9HWJ7;A0A024RDT4;P13796;Q53F   | Plastin-2                     | HEL-S-37;LCP1           |
| 50,222               | V9HW75;A0A087WSV8;P80303;Q2L6   | V9HW75;A0A087WSV8;P80303;Q2L    | Nucleobindin-2;Nesfatin-1     | HEL-S-109;NUCB2;Nucb2   |
| 8,641                | Q07654;A0A0A6YYJ4;X6R3S7        | Q07654;A0A0A6YYJ4;X6R3S7        | Trefoil factor 3              | TFF3                    |
| 19,6                 | A0A0C4DGN4;C3PTT6;G8H6I3;Q96DA  | A0A0C4DGN4;C3PTT6;G8H6I3;Q96D   | Zymogen granule protein 1     | ZG16B;PAUF;EECP         |
| 70,051               | PODMV8;PODMV9;A0A0G2JIW1;A8K5   | PODMV8;PODMV9;A0A0G2JIW1;A8K    | Heat shock 70 kDa protein 1   | HSPA1A;HSPA1B;HEL-S-103 |
| 15,799               | A0A0K0K1J1;P01034               | A0A0K0K1J1;P01034               | Cystatin-C                    | CST3                    |

104,85 O43707;A0A0S2Z3G9;Q96BG6;F5GXS: O43707;A0A0S2Z3G9;Q96BG6;F5GX: Alpha-actinin-4 ACTN4  
65,33 A0A0S2Z3Y1;Q08380;B4DVE1;B4DWA A0A0S2Z3Y1;Q08380;B4DVE1;B4DW Galectin-3-binding protein LGALS3BP  
57,838 B4DRR0;CON\_\_P02538;A8K2I0;A0A0S B4DRR0;CON\_\_P02538;A8K2I0;A0A0 Keratin, type II cytoskeletal KRT6A  
29,032 A0A0S2Z4G4;A0A0S2Z4I4;B2RDE1;A0A A0A0S2Z4G4;A0A0S2Z4I4;B2RDE1;AC Tropomyosin alpha-3 chain; TPM3;DKFZp686J1372;TPM  
13,436 Q0ZCH9;A0A0X9USM3;Q0ZCH4;Q9UL Q0ZCH9;A0A0X9USM3;Q0ZCH4;Q9UL Ig heavy chain V-III region JON  
13,525 A0A0X9UWK7;A0A0F7T891;A0A0F7TE A0A0X9UWK7  
12,468 A0A0X9UWL5;A0A0X9TDD0;A0A125Q A0A0X9UWL5;A0A0X9TDD0  
13,096 A0A125U0U7;A0A120HF66 A0A125U0U7  
60,673 A0A140VJ17;Q16610;C8CHS3;B7ZAS5 A0A140VJ17;Q16610;C8CHS3 Extracellular matrix protein ECM1  
49,496 A0A140VJ6;P02679;C9JEU5;C9JC84;A A0A140VJ6;P02679;C9JEU5;C9JC84 Fibrinogen gamma chain FGG;DKFZp779N0926  
34,258 A0A140VK00;P25311;C9JEV0;A0JLQ0; A0A140VK00;P25311;C9JEV0 Zinc-alpha-2-glycoprotein AZGP1  
69,284 A0A140VK27;P09960;B4DVZ8;Q59ES1 A0A140VK27;P09960;B4DVZ8 Leukotriene A-4 hydrolase;L LTA4H  
37,54 A0A140VK56;P37837;F2Z393;B4DID5 A0A140VK56;P37837;F2Z393;B4DID Transaldolase TALDO1  
78,181 V9HWI4;A0A161I202;P02788;E7EQB2 V9HWI4;A0A161I202;P02788;E7EQB Lactotransferrin;Lactoferric HEL110;LTF  
14,481 A0A193CHQ9;A0A0B4J1V0;Q0ZCJ6;A2 A0A193CHQ9;A0A0B4J1V0;Q0ZCJ6;A2N2G5 IGHV3-15;VH87-2  
51,923 A0A1B0GUU9;P01871 A0A1B0GUU9;P01871 Ig mu chain C region IGHM  
44,552 P07339;V9HWI3;A0A1B0GWE8;A0A1I P07339;V9HWI3;A0A1B0GWE8;A0A1 Cathepsin D;Cathepsin D lig CTSD;HEL-S-130P  
28,889 A0A1R3UCD2;P06870;A0A1L2BPJ2;AC A0A1R3UCD2;P06870;A0A1L2BPJ2;A Kallikrein-1 KLK1  
15,257 P69905;A0A1S5UZ39;D1MGQ2;A0A1K P69905;A0A1S5UZ39;D1MGQ2;A0A1 Hemoglobin subunit alpha HBA1;HBA2  
49,586 CON\_\_P13646-1;A1A4E9;B4DL17;A8K CON\_\_P13646-1;A1A4E9;B4DL17;A8K2H9 KRT13  
25,164 A2KBC4;A2KBC2;A2KBC3;A2KBC5;A2K A2KBC4;A2KBC2;A2KBC3;A2KBC5;A2KBC6;A2KBC7;A2KBC8;A2KE IGHV  
10,392 A2MYE1;A2MYE2;P01599 A2MYE1;A2MYE2;P01599 Ig kappa chain V-I region Gal A30  
12,388 A2NB45;A0A125QYY8 A2NB45  
105,21 Q5T985;A2RTY6;D3DRR6;P19823;B4D Q5T985;A2RTY6;D3DRR6;P19823;B4D Inter-alpha-trypsin inhibitor ITIH2  
5,0526 A2VCK8;P62328;Q0P5T0;Q0P5U7;Q0I A2VCK8;P62328;Q0P5T0;Q0P5U7;Q0I Thymosin beta-4;Hematopoic TMSB4X  
122,2 A5PL27;P00450;E9PFZ2;B7Z5Q2;Q1L A5PL27;P00450;E9PFZ2;B7Z5Q2;Q1L Ceruloplasmin CP  
223,02 A5YM51;P12883;Q59EV3;P13533;Q5 A5YM51;P12883;Q59EV3;P13533;Q5 Myosin-7;Myosin-6 MYH7;MYH6  
51,596 A8K008 A8K008  
99,949 A9X9L0;A8K2P8;B4DLJ5;Q02487;A9X A9X9L0;A8K2P8;B4DLJ5;Q02487;A9X Desmocollin-2 DSC2;DKFZp686P18250;DI  
161,1 A8K2U0;H0YGG5;Q6ZWK7;H0YH14;F5 A8K2U0;H0YGG5;Q6ZWK7 Alpha-2-macroglobulin-like A2ML1  
18,012 V9HWF5;A8K486;P62937;B2RE56;B4I V9HWF5;A8K486;P62937;B2RE56;B4I Peptidyl-prolyl cis-trans isomerase HEL-S-69p;PPIA  
53,533 Q9UBG3;A8K5I6;B4DQ53 Q9UBG3;A8K5I6 Cornulin CRNN  
53,907 Q53GX6;A8K7Q1;Q02818;B4DZX0;H7 Q53GX6;A8K7Q1;Q02818;B4DZX0;H7 Nucleobindin-1 NUCB1  
59,256 P11413;A8K8D9;B4DYA7;Q2VF42;Q2C P11413;A8K8D9;B4DYA7;Q2VF42;Q2C Glucose-6-phosphate 1-dehydrogenase G6PD

|        |                                  |                                  |                                   |                       |
|--------|----------------------------------|----------------------------------|-----------------------------------|-----------------------|
| 16,537 | B2R4C5;P61626;F8VV32;A0A0B4J259  | B2R4C5;P61626                    | Lysozyme;Lysozyme C               | LYZ                   |
| 11,367 | B2R4R0;P62805;Q0VAS5;Q6B823      | B2R4R0;P62805;Q0VAS5             | Histone H4                        | HIST1H4H;HIST1H4A     |
| 46,659 | V9HWJ2;B2R5M8;O75874;Q0QER2;V9   | V9HWJ2;B2R5M8;O75874;Q0QER2;V9   | Isocitrate dehydrogenase [N       | HEL-S-26;IDH1;HEL-216 |
| 30,656 | B2R7T8;B1AK87;B1AK88;B4DWA6;P4   | B2R7T8;B1AK87;B1AK88;B4DWA6;P4   | F-actin-capping protein sub       | CAPZB                 |
| 27,566 | V9HWG9;B2R983;P78417;Q5TA02;Q5   | V9HWG9;B2R983;P78417;Q5TA02;Q5   | Glutathione S-transferase or      | HEL-S-21;GSTO1        |
| 16,837 | P0DP24;B4DJ51;H0Y7A7;P0DP25;B2R  | P0DP24;B4DJ51;H0Y7A7;P0DP25;B2R  | Calmodulin-binding domain protein | HEP-2;CALM1           |
| 45,333 | B3KNK9;Q8NB4;F8WAT9;C9JYM4;C9J   | B3KNK9;Q8NB4;F8WAT9;C9JYM4;C9J   | Golgi membrane protein 1          | GOLPH2;GOLM1          |
| 50,151 | P68363;B3KT06;B3KPS3;A8JZY9;Q9BC | P68363;B3KT06;B3KPS3;A8JZY9;Q9BC | Tubulin alpha-1B chain;Tub        | TUBA1B;TUBA1C         |
| 16,057 | Q5H9A7;Q6FGX5;B3KQF4;P01033;H0   | Q5H9A7;Q6FGX5;B3KQF4;P01033;H0   | Metalloproteinase inhibitor       | TIMP1                 |
| 54,739 | P55058;B3KUE5;Q53H91             | P55058;B3KUE5;Q53H91             | Phospholipid transfer prote       | PLTP                  |
| 143,66 | B3KVV6                           | B3KVV6                           |                                   |                       |
| 47,311 | B3KXD3;P16870;H0YAM0;D6RF88;C9.  | B3KXD3;P16870                    | Carboxypeptidase E                | CPE                   |
| 106,87 | V9HWJ0;B4DJ30;Q14697;F5H6X6;B4I  | V9HWJ0;B4DJ30;Q14697;F5H6X6;B4I  | Neutral alpha-glucosidase A       | HEL-S-164nA;GANAB     |
| 56,852 | B4DJ12;P28799;K7EKL3;K7EQ05;B4E  | B4DJ12;P28799;K7EKL3;K7EQ05;B4E  | Granulins;Acrogranin;Parag        | GRN                   |
| 30,767 | B4DL49;Q5HYG5                    | B4DL49                           |                                   |                       |
| 50,663 | Q6IAT1;B4DLV7;P50395;Q5SX87;Q8T  | Q6IAT1;B4DLV7;P50395;Q5SX87      | Rab GDP dissociation inhibi       | GDI2                  |
| 46,496 | B4DPP8;D3DNU8;B4E1C2;P01042;Q0   | B4DPP8;D3DNU8;B4E1C2;P01042;Q0   | Kininogen-1;Kininogen-1 he        | KNG1                  |
| 67,599 | B4DPW9;P13797;Q53GY0;A0A0A0MS    | B4DPW9;P13797;Q53GY0;A0A0A0MS    | Plastin-3                         | PLS3                  |
| 35,789 | B4DUH8;P23280;Q5FBW4;Q8N4G4      | B4DUH8;P23280                    | Carbonic anhydrase 6              | CA6                   |
| 59,99  | B4DVJ0;K7EIL4;K7ESF4;Q8N196      | B4DVJ0                           | Glucose-6-phosphate isomerase     |                       |
| 74,831 | B4E1B2                           | B4E1B2                           |                                   |                       |
| 140,94 | B4E1Z4;P00751;A0A1U9X7H2;A0A1U   | B4E1Z4;P00751;A0A1U9X7H2;A0A1U   | Complement factor B;Comp          | CFB                   |
| 26,224 | B5MDF5;P62826;J3KQE5;F5H018;H0Y  | B5MDF5;P62826;J3KQE5;F5H018;H0Y  | GTP-binding nuclear proteir       | RAN                   |
| 71,553 | B7Z507                           | B7Z507                           |                                   |                       |
| 39,411 | C9JV77;B7Z8Q2;P02765;B7Z556      | C9JV77;B7Z8Q2;P02765;B7Z556      | Alpha-2-HS-glycoprotein;Alj       | AHSG                  |
| 78,831 | B7Z992;A0A0A0MS51;B7Z9A0;B7Z6N2  | B7Z992;A0A0A0MS51;B7Z9A0;B7Z6N2  | Guanine nucleotide-binding        | GSN                   |
| 9,9355 | B7ZLF8                           | B7ZLF8                           |                                   |                       |
| 51,621 | CON__P02533;P02533               | CON__P02533;P02533               | Keratin, type I cytoskeletal 1    | KRT14                 |
| 69,366 | CON__P02768-1;P02768;F6KPG5;B2R  | CON__P02768-1;P02768;F6KPG5;B2R  | Serum albumin                     | ALB                   |
| 59,998 | CON__P04259;B4DKV4               | CON__P04259;B4DKV4               |                                   |                       |
| 51,267 | CON__P08779;P08779;Q16195;K7EN'  | CON__P08779;P08779               | Keratin, type I cytoskeletal 1    | KRT16                 |
| 59,51  | CON__P13645;P13645;CON__Q148H    | CON__P13645;P13645               | Keratin, type I cytoskeletal 1    | KRT10                 |
| 62,378 | CON__P13647;P13647;F8W0C6;F8VV   | CON__P13647;P13647               | Keratin, type II cytoskeletal     | KRT5                  |
| 63,91  | CON__P19013;P19013;B4DRW1;B4D    | CON__P19013;P19013;B4DRW1;B4D    | Keratin, type II cytoskeletal     | KRT4                  |

|        |                                  |                                 |                               |                        |
|--------|----------------------------------|---------------------------------|-------------------------------|------------------------|
| 65,432 | CON__P35908v2;P35908             | CON__P35908v2;P35908            | Keratin, type II cytoskeletal | KRT2                   |
| 27,745 | D0PNI1;P63104;E7EX29;B0AZS6;B7Z2 | D0PNI1;P63104;E7EX29;B0AZS6;B7Z | 14-3-3 protein zeta/delta     | YWHAZ                  |
| 9,3804 | Q5T123;Q86Z22;D3DPK5;Q9H299      | Q5T123;Q86Z22;D3DPK5;Q9H299     | SH3 domain-binding glutar     | SH3BGL3;HEL-S-297      |
| 51,672 | D3DPU2;B2RDY9;Q01518;B4DNW7;B    | D3DPU2;B2RDY9;Q01518;B4DNW7;I   | Adenylyl cyclase-associated   | CAP1                   |
| 23,625 | D6CHE9;U3KPS2;P24158             | D6CHE9;U3KPS2;P24158            | Myeloblastin                  | PRTN3                  |
| 21,057 | D9IAI1;P30086;A0A0K0K1J6;B4DRT4; | D9IAI1;P30086;A0A0K0K1J6;B4DRT4 | Phosphatidylethanolamine      | HEL-S-34;PEBP1         |
| 15,998 | P68871;D9YZU5;Q14473;B3VL86;Q9E  | P68871;D9YZU5;Q14473;B3VL86;Q9  | Hemoglobin subunit beta;      | L' HBB                 |
| 54,305 | D9ZGG2;P04004;B7Z553;F5GX75;J7H  | D9ZGG2;P04004                   | Vitronectin;Vitronectin V6E   | VTN                    |
| 15,164 | E7D VW5;Q01469;I6L8B7;A8MUU1     | E7D VW5;Q01469;I6L8B7           | Fatty acid-binding protein,   | FABP5                  |
| 69,412 | P15311;E7EQR4;Q6NUR7;B2R6J2;V9H  | P15311;E7EQR4;Q6NUR7;B2R6J2;V9  | Ezrin;Tyrosine-protein kinas  | EZR;HEL-S-105;EZR-ROS1 |
| 46,736 | P01009;E9KL23;Q13747;Q9P173;Q3I  | P01009;E9KL23;Q13747            | Alpha-1-antitrypsin;Short p   | SERPINA1               |
| 70,897 | P11142;V9HW22;E9PKE3;Q53GZ6;Q9   | P11142;V9HW22;E9PKE3;Q53GZ6;Q   | Heat shock cognate 71 kDa     | HSPA8;HEL-S-72p        |
| 103,28 | P55786;E9PLK3;B7Z899;B7Z4B2;B3K  | P55786;E9PLK3;B7Z899;B7Z4B2;B3K | Puromycin-sensitive amino     | NPEPPS                 |
| 11,985 | E9PNW4;Q6FHM9;E9PR17;P13987;H    | E9PNW4;Q6FHM9;E9PR17;P13987;H   | CD59 glycoprotein             | CD59                   |
| 16,93  | P60660;F8W1R7;G3V1V0;J3KND3;B7   | P60660;F8W1R7;G3V1V0;J3KND3;B   | Myosin light polypeptide 6    | MYL6                   |
| 21,058 | F8WCF6;P59998;F8WDD7;A0A0A6YY    | F8WCF6;P59998;F8WDD7;A0A0A6Y    | Actin-related protein 2/3     | cc ARPC4-TTL3;ARPC4    |
| 8,4984 | H0YLF3                           | H0YLF3                          |                               | B2M                    |
| 65,969 | H6VRG0;H6VRF8;H6VRG1;P04264;H6   | H6VRG0;H6VRF8;H6VRG1;P04264;H   | Keratin, type II cytoskeletal | KRT1                   |
| 11,737 | H9ZYJ2;P10599                    | H9ZYJ2;P10599                   | Thioredoxin                   | TXN                    |
| 19,591 | J3KNB4;P49913                    | J3KNB4;P49913                   | Cathelicidin antimicrobial    | † CAMP                 |
| 27,63  | P54108;J3KPA1;I3L0A1             | P54108;J3KPA1                   | Cysteine-rich secretory prot  | CRISP3                 |
| 84,659 | K9JA46;P07900;Q2VPJ6;Q8TBA7;Q86  | K9JA46;P07900;Q2VPJ6;Q8TBA7;Q8  | Heat shock protein HSP 90-    | EL52;HSP90AA1          |
| 26,922 | Q5SRT3;Q53FB0;O00299;A0A1U9X8Y   | Q5SRT3;Q53FB0;O00299;A0A1U9X8   | Chloride intracellular chanr  | CLIC1                  |
| 82,577 | O00391;A0A140VKE5;A8K4C2;A8K47   | O00391;A0A140VKE5;A8K4C2;A8K47  | Sulfhydryl oxidase 1;Sulfhyc  | QSOX1;BPGF-1           |
| 34,333 | Q53R19;O15144;Q9BXV5;A0A024R40   | Q53R19;O15144;Q9BXV5            | Actin-related protein 2/3     | cc ARPC2               |
| 36,019 | O60218;A4D1P0;C9JRZ8             | O60218                          | Aldo-keto reductase family    | : AKR1B10              |
| 66,193 | V9HWG7;O75083;Q53H17;Q53GN4;C    | V9HWG7;O75083;Q53H17;Q53GN4;C   | WD repeat-containing prot     | HEL-S-52;WDR1          |
| 36,688 | P00338;V9HWB9;B4DJI1;F5GXY2;F5G  | P00338;V9HWB9;B4DJI1;F5GXY2;F5  | L-lactate dehydrogenase A c   | LDHA;HEL-S-133P        |
| 32,118 | V9HWH6;Q8N7G1;P00491;G3V5M2;C    | V9HWH6;Q8N7G1;P00491;G3V5M2     | Purine nucleoside phosphoi    | HEL-S-156an;PNP        |
| 44,614 | V9HWF4;P00558;B4E1H9;B4DHB3;B4   | V9HWF4;P00558;B4E1H9;B4DHB3;B   | Phosphoglycerate kinase;Ph    | HEL-S-68p;PGK1         |
| 45,205 | P00738;H0Y300;J3QR68;A0A0C4DGL   | P00738;H0Y300;J3QR68;A0A0C4DGL  | Haptoglobin;Haptoglobin a     | HP                     |
| 163,29 | P01023;H0YFH1;F8W7L3;Q9BQ22      | P01023                          | Alpha-2-macroglobulin         | A2M                    |
| 187,15 | V9HWA9;P01024;B4E216;M0QYC8;M    | V9HWA9;P01024;B4E216            | Complement C3;Compleme        | HEL-S-62p;C3           |
| 16,214 | P01036                           | P01036                          | Cystatin-S                    | CST4                   |

|        |                                 |                                 |                              |                         |
|--------|---------------------------------|---------------------------------|------------------------------|-------------------------|
| 16,387 | P01037                          | P01037                          | Cystatin-SN                  | CST1                    |
| 18,098 | P01591;D6RD17;D6RHJ6;C9JA05     | P01591;D6RD17;D6RHJ6            | Immunoglobulin J chain       | IGJ;JCHAIN              |
| 83,283 | P01833                          | P01833                          | Polymeric immunoglobulin     | PIGR                    |
| 57,019 | Q6N030;Q5EBM2;P01860;A0A286YES  | Q6N030;Q5EBM2;P01860;A0A286YE   | Ig gamma-3 chain C region    | DKFZp686I15212;IGHG3;FI |
| 94,972 | P02671;A0A0S2Z3E8;Q3KRA7;Q6NSD  | P02671;A0A0S2Z3E8;Q3KRA7;Q6NSD  | Fibrinogen alpha chain;Fibr  | FGA                     |
| 55,928 | V9HVV1;P02675;B4E1D3;D3DP13;D6F | V9HVV1;P02675;B4E1D3;D3DP13;D6F | Fibrinogen beta chain;Fibrir | HEL-S-78p;FGB           |
| 23,511 | V9HWF6;P02763                   | V9HWF6;P02763                   | Alpha-1-acid glycoprotein;A  | HEL-S-153w;ORM1         |
| 52,963 | V9HWI6;P02774;D6RF35;D6RBJ7;D6F | V9HWI6;P02774;D6RF35;D6RBJ7     | Vitamin D-binding protein    | HEL-S-51;GC             |
| 51,676 | P02790;Q9BS19;B7Z8Q4            | P02790                          | Hemopexin                    | HPX                     |
| 14,326 | P03973                          | P03973                          | Antileukoproteinase          | SLPI                    |
| 59,755 | P04040;B4DWK8;Q8TAK2;A0A1C9J7V  | P04040;B4DWK8                   | Catalase                     | CAT                     |
| 39,42  | V9HWN7;P04075;H3BQN4;J3KPS3;H3  | V9HWN7;P04075;H3BQN4;J3KPS3;H3  | Fructose-bisphosphate aldo   | HEL-S-87p;ALDOA         |
| 11,139 | Q76LA1;P04080;A0A1W2PS52;A0A1V  | Q76LA1;P04080;A0A1W2PS52        | Cystatin-B                   | CSTB                    |
| 38,714 | Q5TZZ9;P04083;B5BU38;Q5T3N1;B4D | Q5TZZ9;P04083;B5BU38;Q5T3N1     | Annexin;Annexin A1           | ANXA1                   |
| 54,253 | V9HWD8;P04217;B3KP79;M0R009;B   | V9HWD8;P04217;B3KP79;M0R009     | Alpha-1B-glycoprotein        | HEL-S-163pA;A1BG        |
| 36,053 | V9HVZ4;P04406;E7EUT5;Q2TSD0;Q0Q | V9HVZ4;P04406;E7EUT5;Q2TSD0;Q0Q | Glyceraldehyde-3-phosphat    | HEL-S-162eP;GAPDH       |
| 57,767 | P04745;B7ZMD7;Q6NSB3;Q5T085;H7  | P04745;B7ZMD7;Q6NSB3            | Alpha-amylase 1;Alpha-amy    | AMY1A                   |
| 10,834 | P05109                          | P05109                          | Protein S100-A8;Protein S1   | S100A8                  |
| 83,868 | P05164;J3QSF7;P11678            | P05164                          | Myeloperoxidase;Myeloperi    | MPO                     |
| 15,603 | Q53R15;P05976                   | Q53R15;P05976                   | Myosin light chain 1/3, skel | MYL1                    |
| 13,242 | P06702;B2R4M6                   | P06702;B2R4M6                   | Protein S100-A9;Protein S1   | S100A9                  |
| 97,147 | P06737;E9PK47;B2R825;Q6P1L4;B4D | P06737;E9PK47;B2R825            | Glycogen phosphorylase, liv  | PYGL                    |
| 10,044 | P07108;B8ZWD1;A0A024RAF2;A0A0A  | P07108;B8ZWD1;A0A024RAF2;A0A0A  | Acyl-CoA-binding protein     | DBI                     |
| 36,638 | Q5U077;P07195;A8MW50;C9J7H8;F5  | Q5U077;P07195;A8MW50;C9J7H8;F5  | L-lactate dehydrogenase;L-l  | LDHB                    |
| 68,478 | P07476;B4DU44                   | P07476;B4DU44                   | Involucrin                   | IVL                     |
| 15,054 | P07737;K7EJ44;I3L3D5;CON__P0258 | P07737;K7EJ44                   | Profilin-1                   | PFN1                    |
| 28,518 | P08246;B2MUD5                   | P08246;B2MUD5                   | Neutrophil elastase          | ELANE;ELA2              |
| 28,837 | P08311                          | P08311                          | Cathepsin G                  | CTSG                    |
| 53,651 | V9HWE1;P08670;B3KRK8;B0YJC4;Q5  | V9HWE1;P08670;B3KRK8;B0YJC4;Q5  | Vimentin                     | HEL113;VIM              |
| 23,356 | V9HWE9;P09211;A8MX94;A0A087X2I  | V9HWE9;P09211;A8MX94            | Glutathione S-transferase P  | HEL-S-22;GSTP1          |
| 16,445 | P09228                          | P09228                          | Cystatin-SA                  | CST2                    |
| 192,78 | P0C0L4                          | P0C0L4                          | Complement C4-A;Comple       | C4A                     |
| 48,462 | P0DOX2                          | P0DOX2                          |                              |                         |
| 23,379 | P0DOX7                          | P0DOX7                          |                              |                         |

|        |                                                             |                                 |                                              |
|--------|-------------------------------------------------------------|---------------------------------|----------------------------------------------|
| 22,83  | P0DOX8;Q6PIK1                                               | P0DOX8;Q6PIK1                   | IGL@                                         |
| 52,494 | P10909;E7ERK6;HOYLK8;Q5ISQ2;E7ETI                           | P10909;E7ERK6;HOYLK8;Q5ISQ2;E7E | Clusterin;Clusterin beta cha CLU             |
| 72,332 | V9HWB4;P11021;Q5IST7;B4DEF7                                 | V9HWB4;P11021;Q5IST7            | 78 kDa glucose-regulated pr HEL-S-89n;HSPA5  |
| 16,572 | P12273                                                      | P12273                          | Prolactin-inducible protein PIP              |
| 36,375 | P12429;D6RA82;D6RFG5;D6RCA8;D6I                             | P12429;D6RA82;D6RFG5            | Annexin A3;Annexin ANXA3                     |
| 57,936 | P14618;V9HWB8;B4DNK4;A0A024R5;P14618;V9HWB8;B4DNK4;A0A024R5 | P14618;V9HWB8;B4DNK4;A0A024R5   | Pyruvate kinase PKM;Pyruv PKM;HEL-S-30;PKM2  |
| 28,82  | Q6P6D7;Q6FHU2;Q53G35;P18669;Q0                              | Q6P6D7;Q6FHU2;Q53G35;P18669;Q0  | Phosphoglycerate mutase;P PGAM1;hCG_2015269  |
| 108,33 | P19021;B4DKE0;H7BYD9;D6RG20;Q1                              | P19021;B4DKE0;H7BYD9            | Peptidyl-glycine alpha-amid PAM              |
| 48,206 | P20061                                                      | P20061                          | Transcobalamin-1 TCN1                        |
| 46,872 | P21128;B7Z3J4;B7Z7N4                                        | P21128;B7Z3J4                   | Poly(U)-specific endoribonu ENDOU            |
| 80,287 | P22079;F5H386;B4E1M1;B4DUH9;J3C                             | P22079;F5H386;B4E1M1            | Lactoperoxidase LPO                          |
| 7,9053 | P22532                                                      | P22532                          | Small proline-rich protein 2 SPRR2D          |
| 22,742 | V9HWC6;P23284                                               | V9HWC6;P23284                   | Peptidyl-prolyl cis-trans isom HEL-S-39;PPIB |
| 18,502 | V9HWI5;P23528;G3V1A4;E9PP50;E9P                             | V9HWI5;P23528;G3V1A4;E9PP50;E9  | Cofilin-1 HEL-S-15;CFL1                      |
| 67,819 | V9HWC0;P26038;Q6PJT4;B7Z4C7;B7Z                             | V9HWC0;P26038;Q6PJT4            | Moesin HEL70;MSN                             |
| 16,891 | P27482                                                      | P27482                          | Calmodulin-like protein 3 CALML3             |
| 16,08  | P28325                                                      | P28325                          | Cystatin-D CST5                              |
| 15,693 | P29373;Q5SYZ4                                               | P29373;Q5SYZ4                   | Cellular retinoic acid-bindin CRABP2         |
| 67,877 | V9HWD9;P29401;Q53EM5;B4E022;B3                              | V9HWD9;P29401;Q53EM5;B4E022;B3  | Transketolase HEL107;TKT                     |
| 25,035 | V9HWC7;P30041;A4UCS6;B4DUK1                                 | V9HWC7;P30041                   | Peroxiredoxin-6 HEL-S-128m;PRDX6             |
| 17,031 | V9HW35;P30044                                               | V9HW35;P30044                   | Peroxiredoxin-5, mitochondon HEL-S-55;PRDX5  |
| 42,741 | V9HWH1;P30740;B4E3A8;C9J7N5;B2I                             | V9HWH1;P30740;B4E3A8            | Leukocyte elastase inhibitor HEL57;SERPINB1  |
| 57,509 | Q6PKA6;P30838;E9PNN6;C9JMC5;I3L                             | Q6PKA6;P30838;E9PNN6;C9JMC5;I3L | Aldehyde dehydrogenase, di ALDH3A1           |
| 28,082 | V9HWD6;P31946;B5BU24;Q4VY20;Q4                              | V9HWD6;P31946;B5BU24            | 14-3-3 protein beta/alpha;1 HEL-S-1;YWHAB    |
| 27,774 | P31947;Q3YBA8                                               | P31947                          | 14-3-3 protein sigma SFN                     |
| 11,74  | P31949;V9HWH9;B2R5H0                                        | P31949;V9HWH9;B2R5H0            | Protein S100-A11;Protein S S100A11;HEL-S-43  |
| 21,892 | V9HW12;P32119;B4DF70;A6NIW5;AC                              | V9HW12;P32119;B4DF70;A6NIW5     | Peroxiredoxin-2 HEL-S-2a;PRDX2               |
| 62,064 | P35527;CON__P35527;K7EQQ3                                   | P35527;CON__P35527;K7EQQ3       | Keratin, type I cytoskeletal 9 KRT9          |
| 61,448 | P36871;B4DFP1;B7Z6C2;B4DDQ8;Q9I                             | P36871;B4DFP1;B7Z6C2;B4DDQ8     | Phosphoglucomutase-1 PGM1                    |
| 22,391 | P37802;X6RJP6;B7Z5A2                                        | P37802;X6RJP6                   | Transgelin-2 TAGLN2                          |
| 36,426 | V9HWF2;P40925;B9A041;B8ZZ51;C9J                             | V9HWF2;P40925;B9A041;B8ZZ51;C9J | Malate dehydrogenase;Malate HEL-S-32;MDH1    |
| 53,139 | P52209;B4E2U0;B4DL86;K7EM49;B4I                             | P52209;B4E2U0;B4DL86;K7EM49;B4I | 6-phosphogluconate dehyd PGD                 |
| 23,207 | V9HWE8;P52565;J3KRE2;J3KTF8;J3C                             | V9HWE8;P52565;J3KRE2;J3KTF8;J3C | Rho GDP-dissociation inhib HEL-S-47e;ARHGDI  |
| 10,245 | Q6EZE9;P59666;P59665                                        | Q6EZE9;P59666;P59665            | Neutrophil defensin 3;HP 3- DEFA3;DEFA1      |

|        |                                  |                                  |                              |                         |
|--------|----------------------------------|----------------------------------|------------------------------|-------------------------|
| 26,669 | V9HWK1;P60174;Q53HE2;B4DUI5;Q2   | V9HWK1;P60174;Q53HE2;B4DUI5;Q    | Triosephosphate isomerase    | HEL-S-49;TPI1           |
| 44,76  | P61160;Q8IY98;F5H6T1;B4DHK9;B4D  | P61160;Q8IY98;F5H6T1;B4DHK9;B4I  | Actin-related protein 2      | ACTR2                   |
| 29,174 | V9HW98;P62258;G9K389;G9K388;Q5   | V9HW98;P62258;G9K389;G9K388;C    | 14-3-3 protein epsilon       | HEL2;YWHAE;YWHAE/FAM2   |
| 41,792 | P63261;B4E3A4;B4DVQ0;I3L3I0;I3L1 | P63261;B4E3A4;B4DVQ0;I3L3I0;I3L1 | Actin, cytoplasmic 2;Actin,  | ACTG1                   |
| 50,112 | Q53G85;Q5VTE0;Q53GE9;Q6IPT9;Q6I  | Q53G85;Q5VTE0;Q53GE9;Q6IPT9;Q6   | Elongation factor 1-alpha;Pi | EEF1A1P5;EEF1A1;EEF1A1L |
| 42,051 | P68133;P68032;A8K3K1;B7Z6P1;P62  | P68133;P68032;A8K3K1;B7Z6P1;P6   | Actin, alpha skeletal muscle | ACTA1;ACTC1;ACTA2;ACTG2 |
| 49,83  | P68371;Q8IWP6;Q8IZ29;Q8N6N5;P04  | P68371;Q8IWP6;Q8IZ29;Q8N6N5;P0   | Tubulin beta-4B chain;Tubu   | TUBB4B;TUBB2C;TUBB4A    |
| 22,693 | P80723                           | P80723                           | Brain acid soluble protein 1 | BASP1                   |
| 113,75 | Q02413                           | Q02413                           | Desmoglein-1                 | DSG1                    |
| 22,11  | Q06830;Q5IST6;A0A0A0MSI0;B2R4P2  | Q06830;Q5IST6;A0A0A0MSI0;B2R4P   | Peroxiredoxin-1              | PRDX1                   |
| 76,631 | Q08188                           | Q08188                           | Protein-glutamine gamma-g    | TGM3                    |
| 15,945 | Q14019;H3BT58                    | Q14019;H3BT58                    | Coactosin-like protein       | COTL1                   |
| 12,993 | Q14508;A8K2M3                    | Q14508                           | WAP four-disulfide core dor  | WFDC2                   |
| 24,488 | Q15907;H3BMH2;H3BSC1;A0A024R57   | Q15907;H3BMH2;H3BSC1;A0A024R5    | Ras-related protein Rab-11B  | RAB11B;RAB11A           |
| 32,642 | Q32Q12;Q6FHN3;J3KPD9;P22392;O6   | Q32Q12;Q6FHN3;J3KPD9;P22392      | Nucleoside diphosphate kin   | NME1-NME2;NME2          |
| 53,113 | Q86U78;Q53YY1;Q53GY3;Q59EP2;B4E  | Q86U78;Q53YY1;Q53GY3;Q59EP2;B4   | Angiotensinogen;Angiotens    | AGT                     |
| 51,098 | Q6MZU6                           | Q6MZU6                           |                              | DKFZp686C15213          |
| 37,926 | Q6P5S2                           | Q6P5S2                           | Protein LEG1 homolog         | LEG1                    |
| 25,834 | Q6PIL8;Q6PJF2                    | Q6PIL8;Q6PJF2                    |                              | IGK@                    |
| 60,54  | Q6UWP8;K7ESC4                    | Q6UWP8                           | Suprabasin                   | SBSN                    |
| 49,172 | Q8N4F0;B4E209                    | Q8N4F0;B4E209                    | BPI fold-containing family B | BPIFB2                  |
| 39,158 | Q8TAX7;D6RHX1                    | Q8TAX7;D6RHX1                    | Mucin-7                      | MUC7                    |
| 52,441 | Q8TDL5                           | Q8TDL5                           | BPI fold-containing family B | BPIFB1                  |
| 27,011 | Q96DR5;A8K739                    | Q96DR5;A8K739                    | BPI fold-containing family A | BPIFA2                  |
| 68,283 | Q96G03;B4DN40;E7ENQ8;Q4W5D6;E9   | Q96G03;B4DN40                    | Phosphoglucomutase-2         | PGM2                    |
| 54,392 | Q96HE7;G3V3E6;G3V5B3;G3V2H0;G3   | Q96HE7                           | ERO1-like protein alpha      | ERO1L                   |
| 53,088 | Q96K68                           | Q96K68                           |                              |                         |
| 596,33 | Q9HC84;A7Y9J9;B4E1L4;O75372;Q93  | Q9HC84;A7Y9J9                    | Mucin-5B                     | MUC5B;MUC5AC            |
| 44,786 | Q9NPP6;A0A068LKQ8                | Q9NPP6                           |                              |                         |
| 120,71 | Q9NQ38;E7EWP9                    | Q9NQ38;E7EWP9                    | Serine protease inhibitor Ka | SPINK5                  |
| 15,892 | Q9NZT1;Q53H37                    | Q9NZT1;Q53H37                    | Calmodulin-like protein 5    | CALML5                  |
| 18,154 | Q9UBC9;B1AN48                    | Q9UBC9;B1AN48                    | Small proline-rich protein 3 | SPRR3                   |
| 260,73 | Q9UGM3;B6V682;B4E262             | Q9UGM3                           | Deleted in malignant brain t | DMBT1                   |
| 44,276 | Q9UIV8;B7Z8T4;C9JL93;B7Z4X7;H7BZ | Q9UIV8;B7Z8T4                    | Serpin B13                   | SERPINB13               |

|        |                                 |                             |                             |           |
|--------|---------------------------------|-----------------------------|-----------------------------|-----------|
| 37,375 | Q9UJ70;H7C3G9;C9JEV6;H7C286;H7C | Q9UJ70;H7C3G9;C9JEV6;H7C286 | N-acetyl-D-glucosamine kin: | NAGK      |
| 223,04 | Q9UKX2;P13535;B4DRV3;B4E0I9;B4D | Q9UKX2;P13535               | Myosin-2;Myosin-8           | MYH2;MYH8 |
| 12,437 | Q9UL90;A0A0J9YY99;A0A1C9J6Z4    | Q9UL90;A0A0J9YY99           |                             |           |
| 21,627 | Q9ULZ3;B2RAZ4;H3BP42            | Q9ULZ3;B2RAZ4               | Apoptosis-associated speck- | PYCARD    |
| 572,01 | Q9Y6R7;A0A087WXI2;A0A087WUZ2;A  | Q9Y6R7;A0A087WXI2           | IgGFc-binding protein       | FCGBP     |
| 24,823 | S6BGD6                          | S6BGD6                      |                             |           |



|         |
|---------|
| cluster |
|---------|

1

3

4

1

1

0

1

1

4

1

5

5

1

4

0

1

1

1

5

5

1

1

1

5

5

1

3

5

3

3

2

5

3

0  
5  
1  
0  
5  
3  
1  
1  
1  
5  
2  
0  
5  
2  
5  
5  
3  
5  
3  
5  
5  
3  
3  
3  
1  
5  
3  
1  
2  
4  
5  
5  
5  
1  
1

5  
4  
1  
1  
1  
4  
1  
1  
3  
1  
1  
1  
1  
1  
1  
4  
1  
1  
2  
5  
2  
1  
1  
0  
1  
5  
4  
1  
2  
5  
4  
5  
4  
5



2  
2  
2  
3  
0  
0  
3  
0  
5  
3  
0  
5  
5  
5  
1  
5  
2  
2  
2  
5  
1  
2  
0  
1  
1  
1  
1  
5  
0  
1  
1  
5  
2  
1  
3  
3

1  
3  
4  
2  
1  
5  
0  
1  
5  
1  
5  
4  
1  
5  
0  
4  
5  
1  
0  
4  
1  
5  
1  
1  
1  
5  
4  
1  
5  
1  
1  
1  
4  
5  
1  
5

5  
1  
1  
2  
1  
0  
1  
1  
4  
4  
4  
1  
3  
1  
1  
1  
5  
2  
2  
1  
2  
3  
5  
2  
1  
4  
2  
2  
2  
2  
1  
1  
5  
2  
1

1  
1  
1  
1  
5  
2
